# Supplementary material for: Enhanced electrochemical properties of LiFePO4 by Mo-substitution and graphitic carbon-coating via a facile and fast microwave-assisted solid-state reaction
Source: Royal Society of Chemistry journal article supplement (doi:10.1039/c2cp24062a), 2012-01-01
Supplement: c2cp24062a.pdf [file c2cp24062a.pdf]

## Supplementary Information

### Enhanced electrochemical properties of $\text{LiFePO}_4$ by Mo-substitution and graphitic carbon-coating via a facile and fast microwave-assisted solid-state reaction

Dan Li,<sup>a</sup> Yudai Huang,<sup>c</sup> Neeraj Sharma,<sup>d</sup> Zhixin Chen,<sup>b</sup> Dianzeng Jia<sup>\*c</sup> and Zaiping  
Guo<sup>\*a,b</sup>

<sup>a</sup> Institute for Superconducting and Electronic Materials, University of  
Wollongong, Wollongong, NSW 2522, Australia

<sup>b</sup> School of Mechanical, Materials & Mechatronics Engineering, University of  
Wollongong, NSW 2522, Australia

<sup>c</sup> Institute of Applied Chemistry, Xinjiang University, Urumqi, Xinjiang 830046,  
China

<sup>d</sup> The Bragg Institute, Australian Nuclear Science and Technology Organisation,  
Locked Bag 2001, Kirrawee DC NSW 2232, Australia

Considering the oxidation of iron at high temperature in air, a calibration curve is needed to accurately evaluate the carbon content in Mo-doped  $\text{LiFePO}_4/\text{C}$  samples. In order to obtain the calibration curve, TGA was carried out on  $\text{LiFePO}_4/\text{C}$  mixtures with certain known  $\text{LiFePO}_4/\text{C}$  ratios (carbon ratios of 5, 10, 20 and 30%, respectively), with the carbon obtained by pyrolyzing citric acid under the same conditions. The calculated calibration curve is shown in Fig. S1(a). Then, TGA was conducted on the as-prepared Mo doped  $\text{LiFePO}_4/\text{C}$  nanocomposites. The percentage value of the mass loss was taken from the TGA curve (Fig. S1(b)) and can be

converted into the real content of carbon in the  $\text{LiFePO}_4/\text{C}$  nanocomposite according to the calibration curve. It can be seen from Fig. S1(b) that the weight loss below  $100^\circ\text{C}$  drops sharply from 100% at the starting temperature to about 98%, corresponding to the removal of moisture from the sample. Therefore, the real weight loss due to carbon burn-off for the Mo-doped  $\text{LiFePO}_4/\text{C}$  is about 9%. According to the calibration curve, we can work out that the carbon content in the Mo-doped  $\text{LiFePO}_4/\text{C}$  is about 12%.

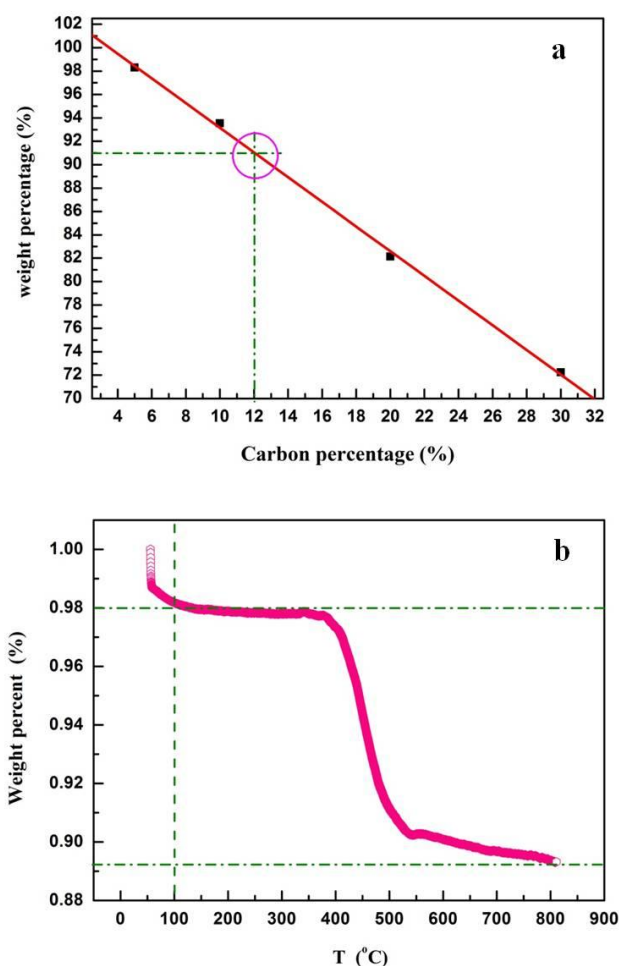

**Fig. S1(a)** Calibration curve for weight percentage with respect to carbon percentage,

(b) TGA curve for the Mo-doped  $\text{LiFePO}_4/\text{C}$  material in air.
